# Supplementary material for: Room-temperature ferromagnetism in Ni(ii)-chromia based core–shell nanoparticles: experiment and first principles calculations
Source: Royal Society of Chemistry journal article supplement (doi:10.1039/c7cp08597d), 2018-01-01
Supplement: c7cp08597d1.pdf [file c7cp08597d1.pdf]

## Supporting Information

### Room-Temperature Ferromagnetism and Exchange Bias in Chromia Core-Shell Nanoparticles Containing a Nickel(II)-Chromia Shell: Experiment and First Principles Calculations

**Authors:** M. D. Hossain<sup>1</sup>, R. A. Mayanovic<sup>1\*</sup>, S. Dey<sup>1†</sup>, R. Sakidja<sup>1</sup>, M. Benamara<sup>2</sup>

#### Affiliations:

<sup>1</sup>Department of Physics, Astronomy & Materials Science, Missouri State University, Springfield, MO 65897.

<sup>2</sup>University of Arkansas Nano-Bio Materials Characterization Facility, University of Arkansas, Fayetteville, AR 72701, USA.

\*robertmayanovic@missouristate.edu.

†Current address: 1420 Sand Creek Road, Albany, NY 12205.

#### Experimental

##### Scanning Electron Microscopy

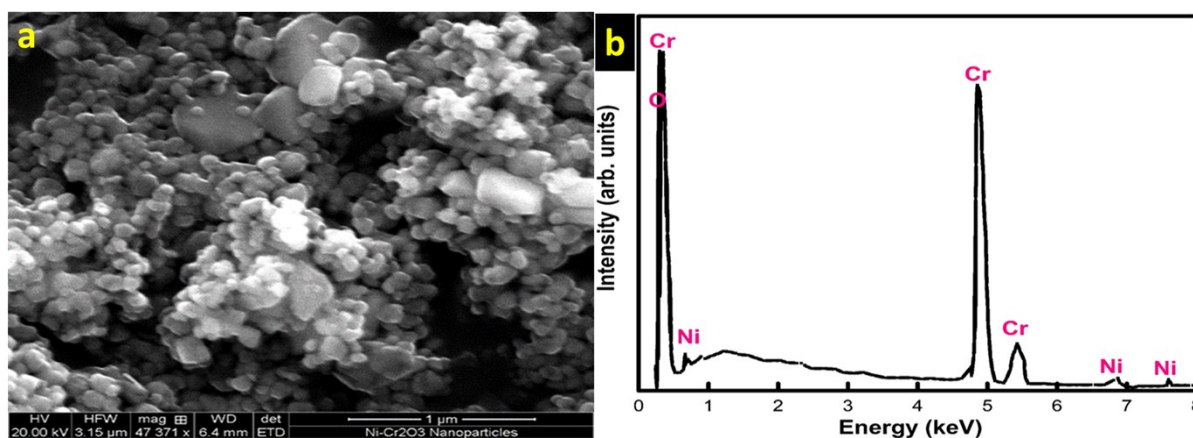

**Fig. S1** (a) An SEM image showing that most of the nanoparticles are spherical in shape and are agglomerated. (b) SEM-EDX data confirms the presence of Ni, Cr and O in the nanoparticles.

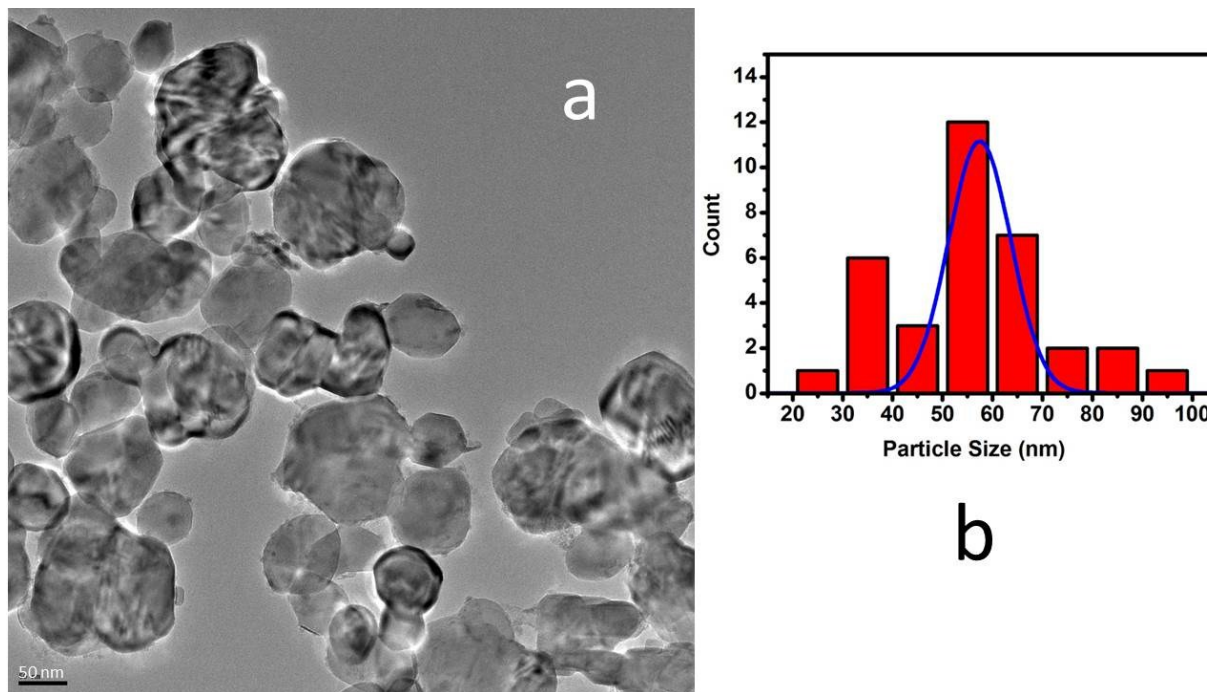

**Fig. S2** a) TEM image of several CSNs used to estimate their mean size and b) a histogram plot of the size distribution of the CSNs and the Gaussian fit (blue line) to the distribution.

#### *Rietveld Refinement of the XRD Data*

The amorphous like background in the XRD pattern is due to the glass substrate used to hold the CSN sample. The incident beam profile and peak asymmetry of the diffractometer were modeled using fundamental peak function<sup>5</sup> from a CeO<sub>2</sub> standard (NIST 674b) XRD data.<sup>6</sup> The lattice parameters of the corundum unit cell, z-position of the Cr atom, x-position of the O atom were refined for the  $\alpha$ -Cr<sub>2</sub>O<sub>3</sub> core and  $\alpha$ -Ni<sub>0.58</sub>Cr<sub>1.42</sub>O<sub>2.88</sub> shell of CSNs. For the shell region, Cr, Ni and O (to account for oxygen vacancy formation) atoms with partial site occupancies were used in the atomic sites within the refinement. The partial site occupancies (in summation form for Cr and Ni), lattice parameters, and Debye-Waller factors were constrained relative to the values used for refining the structure of the  $\alpha$ -Cr<sub>2</sub>O<sub>3</sub> core. The structural parameters from the refinement are given in the Table S1 shown below.

**Table S1.** Summary of structural results obtained from Rietveld refinement for  $\alpha$ -Cr<sub>2</sub>O<sub>3</sub>@ $\alpha$ -Ni<sub>0.58</sub>Cr<sub>1.42</sub>O<sub>2.88</sub> CSNs.

| Core: $\alpha$ -Cr <sub>2</sub> O <sub>3</sub> (SG #167: $R\bar{3}c$ ); $a = b = 4.95160(23)$ Å; $c = 13.57448(80)$ Å; $V = 288.233(32)$ Å <sup>3</sup> ; core size = 47.7(16) nm                                 |            |     |             |                |                     |
|-------------------------------------------------------------------------------------------------------------------------------------------------------------------------------------------------------------------|------------|-----|-------------|----------------|---------------------|
| Atoms                                                                                                                                                                                                             | x          | y   | z           | Site occupancy | B (Å <sup>2</sup> ) |
| Cr                                                                                                                                                                                                                | 0          | 0   | 0.34751(29) | 1.0            | 0.6                 |
| O                                                                                                                                                                                                                 | 0.3291(26) | 0   | 1/4         | 1.0            | 0.6                 |
| Shell: $\alpha$ -Ni <sub>0.58</sub> Cr <sub>1.42</sub> O <sub>2.88</sub> (SG #167: $R\bar{3}c$ ); $a = b = 4.96318(17)$ Å; $c = 13.60696(57)$ Å; $V = 290.276(24)$ Å <sup>3</sup> ; core-shell size = 57.3(29) nm |            |     |             |                |                     |
| Ni                                                                                                                                                                                                                | 0          | 0   | 0.347(35)   | 0.29           | 0.6                 |
| Cr                                                                                                                                                                                                                | 0          | 0   | 0.34(15)    | 0.71           | 0.6                 |
| O                                                                                                                                                                                                                 | 0.3097(18) | 0   | 1/4         | 0.96           | 0.6                 |
| Impurity phase: NiO (SG Fm-3m); $a = 4.0873(27)$ Å                                                                                                                                                                |            |     |             |                |                     |
| Ni                                                                                                                                                                                                                | 0          | 0   | 0           | 1              | 0.414               |
| O                                                                                                                                                                                                                 | 1/2        | 1/2 | 1/2         | 1              | 0.61                |

*X-Ray Photoemission Spectroscopy*

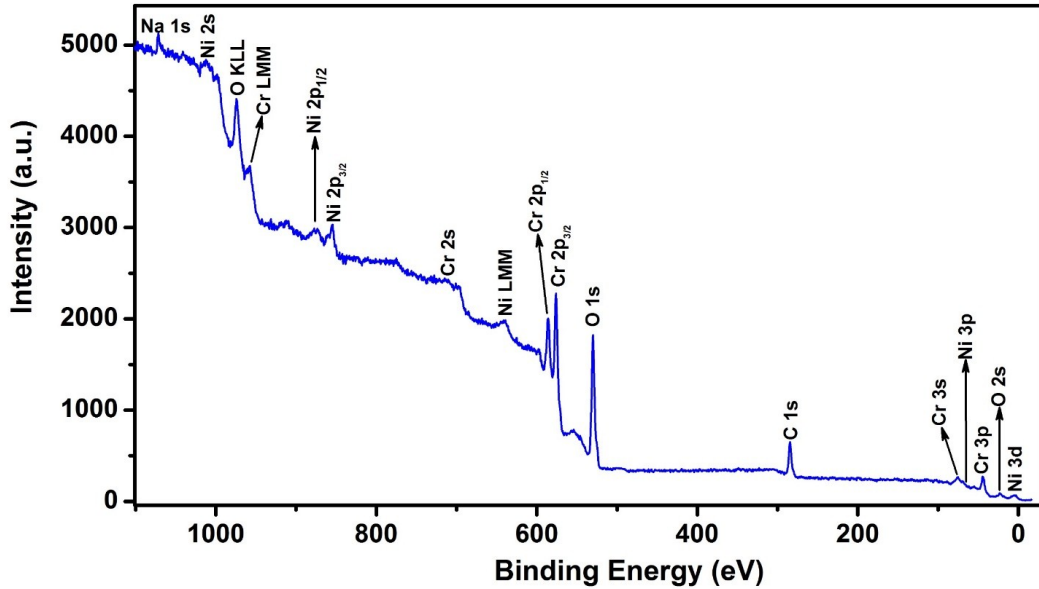

**Fig. S3** XPS survey scan of  $\alpha\text{-Cr}_2\text{O}_3@ \alpha\text{-Ni}_{0.58}\text{Cr}_{1.42}\text{O}_{2.88}$  CSNs. The C originates predominantly from the carbon tape containing the sample.

**Table S2.** Results from fitting of the high-resolution XPS spectra measured from the CSNs. GL(30) indicates a Gaussian-Lorentzian product formula where the percentage of Lorentzian peak shape is indicated in the parenthesis.

| <b>Cr2p<sub>3/2</sub></b> |        | <b>Position</b> | <b>FWHM</b> | <b>Line Shape</b> | <b>Area</b> | <b>%Area</b> |
|---------------------------|--------|-----------------|-------------|-------------------|-------------|--------------|
| Cr-O                      | Peak-1 | 573.37          | 2           | GL(30)            | 421.11      | 11.63        |
|                           | Peak-2 | 574.61          | 1.6         | GL(30)            | 421.11      | 11.63        |
|                           | Peak-3 | 575.68          | 2           | GL(30)            | 1684.42     | 46.51        |
|                           | Peak-4 | 577.53          | 2           | GL(30)            | 421.11      | 11.63        |
| Cr-OH                     |        | 576.8           | 1.8         | GL(30)            | 673.77      | 18.68        |
| <b>O1s</b>                |        |                 |             |                   |             |              |
| Cr-O                      |        | 528.8           | 3.1         | GL(30)            | 2800        | 59.92        |
| Ni-O                      |        | 529.68          | 1.34        | GL(30)            | 280         | 5.95         |
| Cr-OH                     |        | 530.1           | 2.8         | GL(30)            | 1484        | 31.55        |
| Ni-OH                     |        | 532.22          | 1.64        | GL(30)            | 140         | 2.98         |
| <b>Ni2p<sub>3/2</sub></b> |        |                 |             |                   |             |              |
| Ni-O                      |        | 853.42          | 5.18        | GL(30)            | 1242.23     | 51.24        |
| Ni-OH                     |        | 854.95          | 3           | GL(30)            | 372.67      | 15.37        |
| Satellite                 |        | 859.91          | 5.5         | GL(30)            | 809.24      | 33.38        |

**Table S3.** Elemental analysis from XPS data measured from the  $\alpha\text{-Cr}_2\text{O}_3@ \alpha\text{-Ni}_{0.58}\text{Cr}_{1.42}\text{O}_{2.88}$  inverted core-shell NPs. The analysis for elemental content using the Cr2p<sub>3/2</sub>, O1s and Ni2p<sub>3/2</sub> peaks was accomplished using a Shirley background.

| <b>Element</b> | <b>Peaks</b>        | <b>Position</b> | <b>FWHM</b> | <b>Area</b> | <b>Atomic %</b> |
|----------------|---------------------|-----------------|-------------|-------------|-----------------|
| Cr             | Cr2p <sub>3/2</sub> | 576.23          | 3.7         | 4870        | 26.17           |
| O              | O1s                 | 530.23          | 3.5         | 4769.02     | 68.47           |
| Ni             | Ni2p <sub>3/2</sub> | 854.73          | 4.9         | 2068.9      | 5.35            |

*Ni Concentration Estimation in  $\alpha\text{-Cr}_2\text{O}_3@ \alpha\text{-Ni}_x\text{Cr}_{2-x}\text{O}_y$  Core-Shell Nanoparticles*

The average particle size determined using XRD and TEM is 57 nm and HRTEM shows a shell thickness of 5 nm. Considering an XPS sample depth of 10 nm, the outer radius  $R=28.5$  nm, the radius of the core is  $r_2=23.5$  nm and the radius to the penetration depth is  $r_1=18.5$  nm as shown in Fig. S11. The volume ratio of the shell vs XPS sampling volume  $z = 0.6$ ,

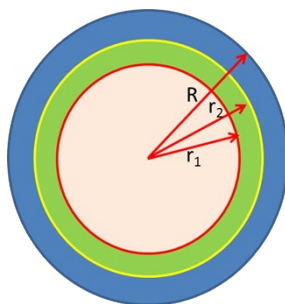

**Fig. S4.** Schematic of a core-shell nanoparticle with dimensions as outlined in the text. We assume a 10 nm sampling depth of XPS.

The atomic percentages calculation from XPS survey scan provides Ni:Cr:(O+OH) = 5.35 : 26.17 : 68.47; excluding the OH contribution Ni:Cr:O = 5.35 : 26.17 : 44.62 and normalization gives final atomic percentages of Ni:Cr:O = 7.03 : 34.37 : 58.6.

For determining the concentration  $x$  value in the sample we will use the sampling volume in the formula of  $(1-z) \cdot [\text{Cr}_2\text{O}_3] + z \cdot [\text{Ni}_x\text{Cr}_{(2-x)}\text{O}_p]$ ;

$$0.0703\text{Ni} + 0.3437\text{Cr} + 0.586\text{O} = 0.4 \cdot [0.4\text{Cr} + 0.6\text{O}] + 0.6 \cdot [y\text{Ni} + (0.423-y)\text{Cr} + 0.577\text{O}]$$

This gives  $y=0.1167$  and  $x=5 \cdot 0.1167 \approx 0.58$ , the corresponding value of  $p$  for O,  $p=2.88$ . Thus the final formula for the shell is  $\text{Ni}_{0.58}\text{Cr}_{1.42}\text{O}_{2.88}$

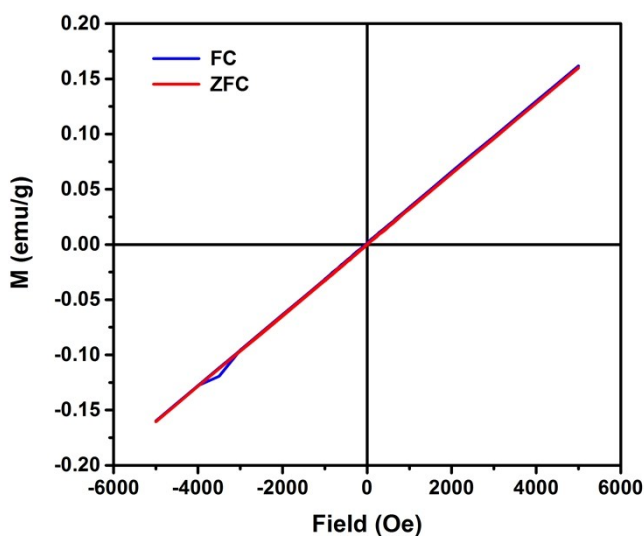

**Fig. S5.** Magnetization hysteresis curves measured from  $\alpha$ -Cr<sub>2</sub>O<sub>3</sub> NPs at 300 K in the zero field cooled (ZFC) and field cooled (FC) condition at 20 kOe.

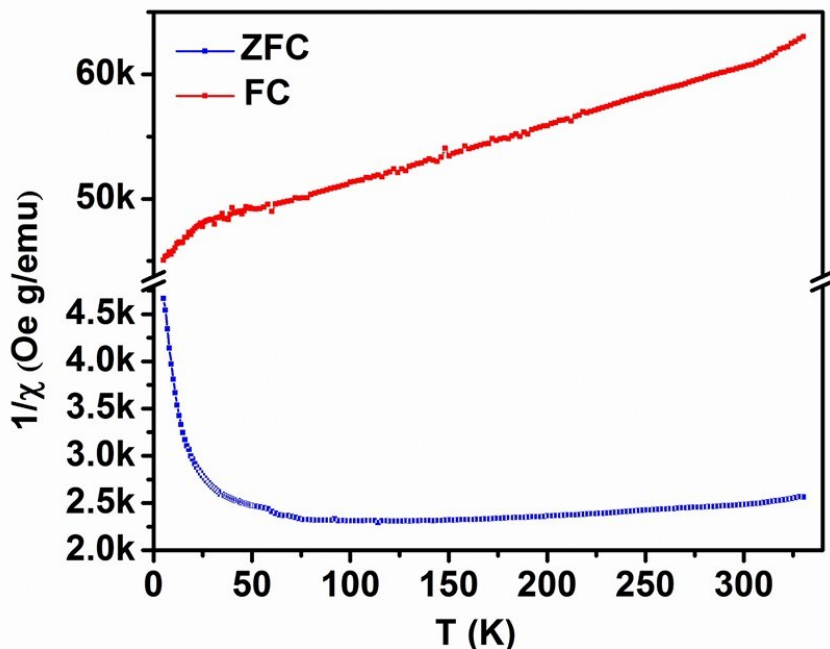

**Fig. S6.** Inverse susceptibility ( $1/\chi$ ) curves measured from our  $\alpha$ -Cr<sub>2</sub>O<sub>3</sub>@ $\alpha$ -Ni<sub>0.58</sub>Cr<sub>1.42</sub>O<sub>2.88</sub> CSNs in the ZFC and FC condition as a function of temperature. Note that the magnitude of  $1/\chi$  is given in engineering notation, e.g., 2.0k is equal to 2000 Oe·g/emu.

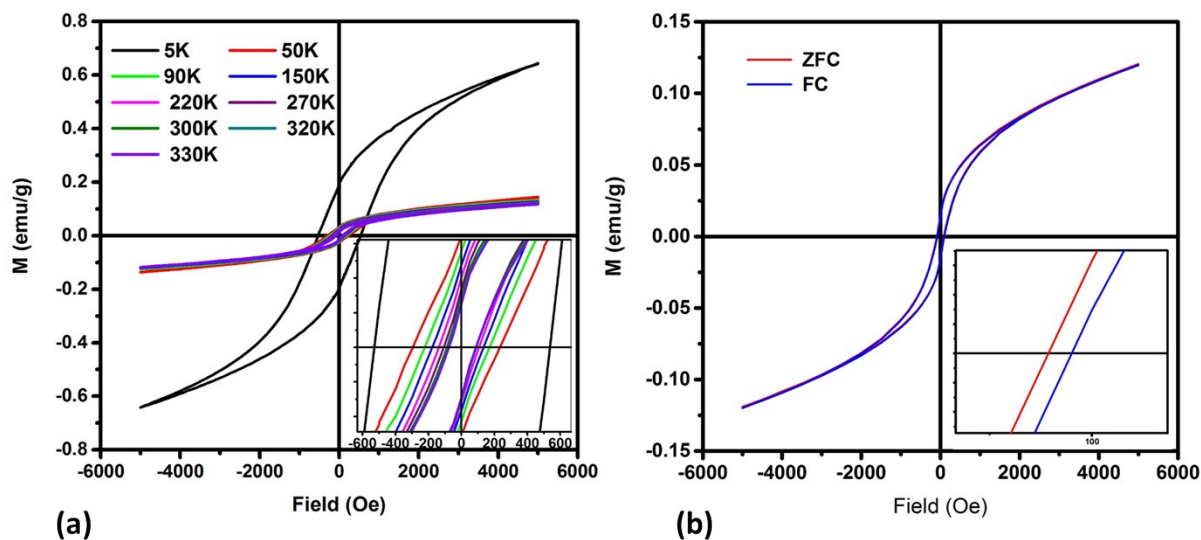

**Fig. S7.** (a) Magnetization hysteresis curves measured from  $\alpha$ -Cr<sub>2</sub>O<sub>3</sub>@ $\alpha$ -Ni<sub>0.58</sub>Cr<sub>1.42</sub>O<sub>2.88</sub> CSNs in the ZFC condition at different temperatures: The inset shows an enlarged view of the data at the

origin. (b) The FC and ZFC magnetization hysteresis measured at 300 K: The inset shows the shift between the FC and ZFC hysteresis curves at the  $M = 0$  value.

### UV-Vis Measurements

A suspension of the CSNs was made in DI water and allowed to evaporate on a microscope glass slide. An Ocean Optics HR 4000 spectrophotometer and a fiber-optic coupled DT-Mini-2 deuterium/tungsten-halogen lamp source (Ocean Optics) were used to measure the UV-Vis transmission/absorption spectra of the CSNs. The accumulated spectra were collected in  $\sim 160$  ms. The energy band gap value  $\sim 2.5(1)$  eV of the CSNs was estimated from the intersection of the fitted line of function  $(\alpha \cdot hv)^{1/2}$ , where  $\alpha$  is the absorption coefficient, at the zero point with the energy ( $hv$ ) axis as shown in Fig S5. Using similar analysis of UV-Vis spectra measured from our  $\alpha$ -Cr<sub>2</sub>O<sub>3</sub>, we obtain a band gap value of  $\sim 3.0(1)$  eV.

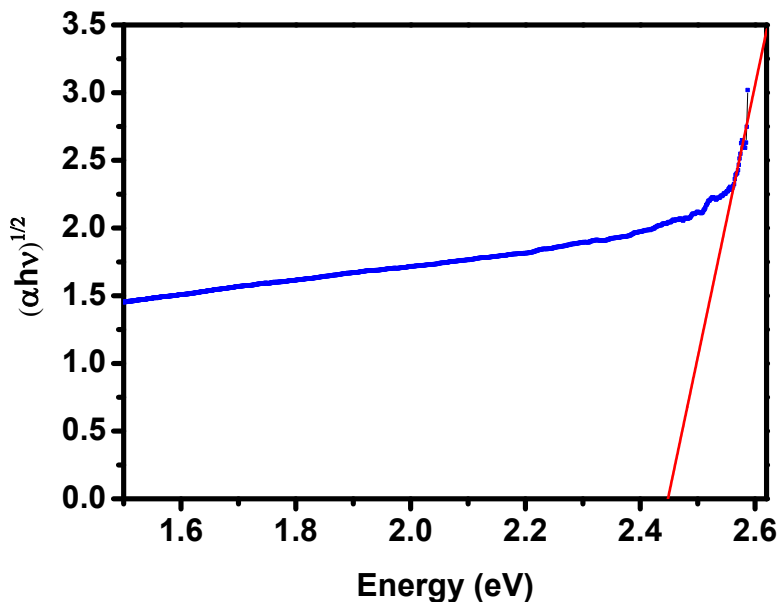

**Fig. S8.** The  $(\alpha \cdot hv)^{1/2}$  quantity plotted vs photon energy ( $hv$ ) as determined from the UV-Vis absorption spectra measured from the CSNs. The extrapolated fitted line intersects the energy axis at 2.45 eV.

### Computational Details

The calculation of partial charges on Ni, Cr and O atoms was made using Bader's procedures, which provides accurate atomic charges for plane wave basis functions, and a program that employs a fast algorithm for performing the Bader analysis.<sup>7</sup> The Bader charge analysis of the  $\alpha$ -Cr<sub>2</sub>O<sub>3</sub> and  $\alpha$ -Ni(II)Cr<sub>3</sub>O<sub>6</sub> structures is shown in Table S4. Electron localization function (ELF)

analysis was performed using procedures described elsewhere,<sup>8,9</sup> the ELF images were generated using the visualization software Vesta.<sup>10</sup>

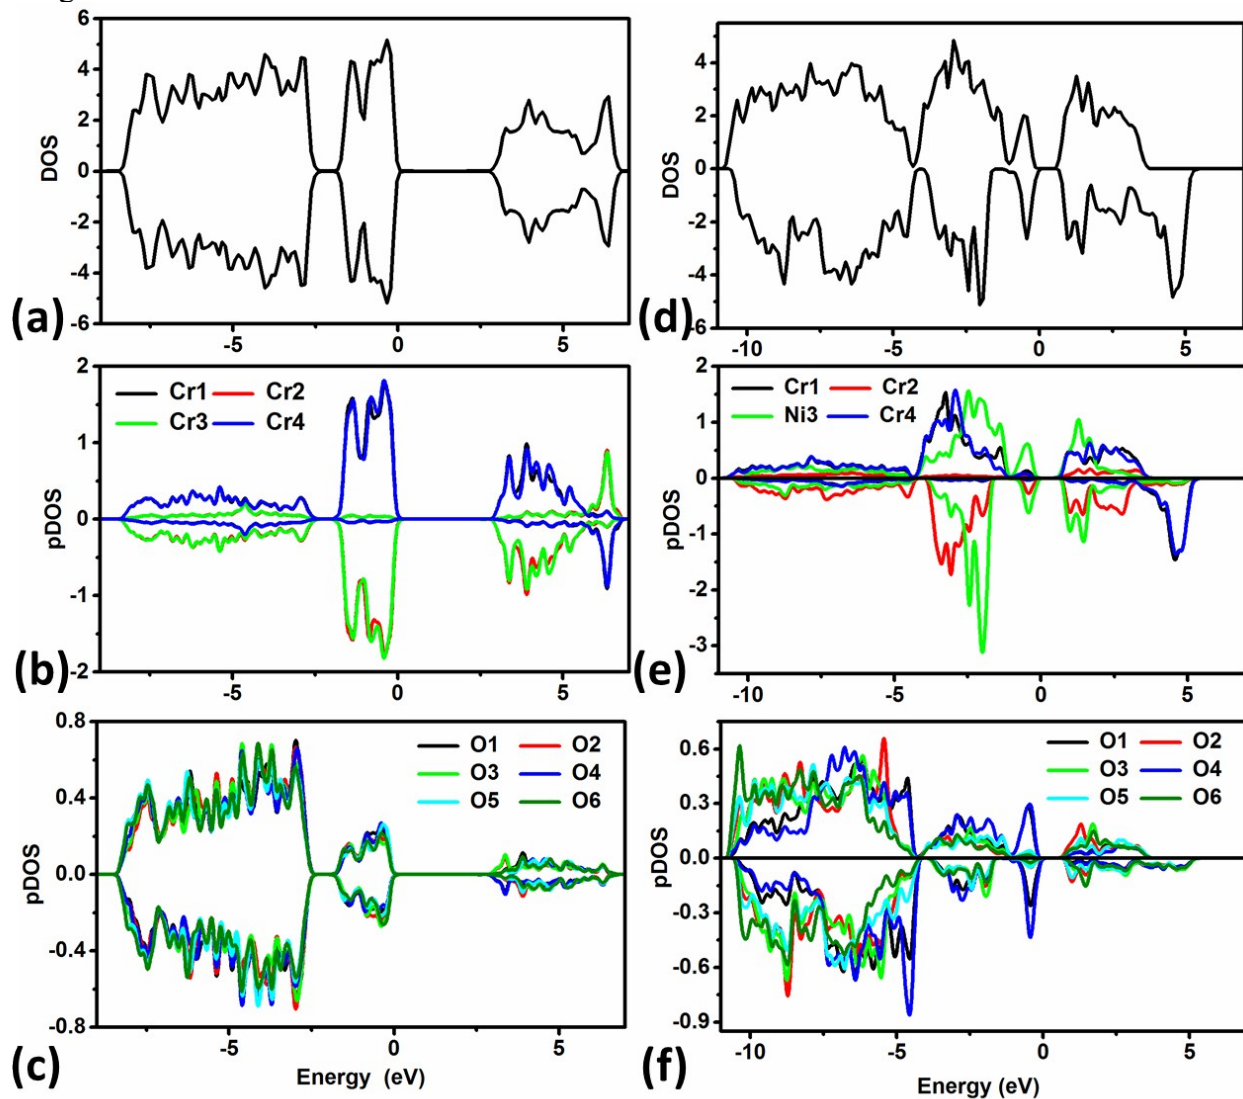

**Fig. S9.** DFT-based calculation results as follows:  $\alpha$ -Cr<sub>2</sub>O<sub>3</sub> structure (a) DOS (b) pDOS of Cr 3d orbital (c) pDOS of O 2p orbitals;  $\alpha$ -Ni(II)Cr<sub>3</sub>O<sub>6</sub> structure (d) DOS (e) pDOS of Cr and Ni 3d orbital (f) pDOS of O 2p orbitals.



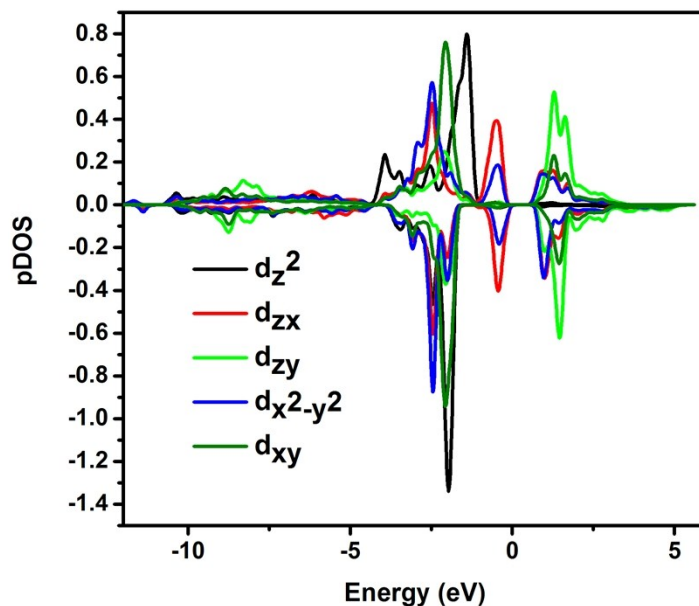

**Fig. S10.** The pDOS plot showing the Ni(II)  $t_{2g}$  ( $d_{xy}$ ,  $d_{zx}$ ,  $d_{zy}$ ) and  $e_g$  ( $d_z^2$  &  $d_{x^2-y^2}$ ) orbitals of  $\alpha$ -Ni(II)Cr<sub>3</sub>O<sub>6</sub>.

**Table S4:** Computed magnetic moments of individual atoms in  $\alpha$ -Cr<sub>2</sub>O<sub>3</sub> and  $\alpha$ -Ni(II)Cr<sub>3</sub>O<sub>6</sub>.

| Atom   | $\alpha$ -Cr <sub>2</sub> O <sub>3</sub><br>(in $\mu_B$ ) | $\alpha$ -Ni(II)Cr <sub>3</sub> O <sub>6</sub><br>(in $\mu_B$ ) |
|--------|-----------------------------------------------------------|-----------------------------------------------------------------|
| Cr1    | +3.11                                                     | +3.12                                                           |
| Cr2    | -3.11                                                     | -3.10                                                           |
| Cr3/Ni | -3.11                                                     | +0.12                                                           |
| Cr4    | +3.11                                                     | +3.09                                                           |

**Table S5:** Bader partial charge analysis of  $\alpha$ -Cr<sub>2</sub>O<sub>3</sub> and  $\alpha$ -Ni(II)Cr<sub>3</sub>O<sub>6</sub> in the primitive rhombohedral 1x1x1 structures; e is the fundamental charge unit of  $\sim 1.6 \times 10^{-19}$  C.

| Atom | Charge ( $\alpha$ -Cr <sub>2</sub> O <sub>3</sub> ) $\cdot e$ | Charge ( $\alpha$ -Ni(II)Cr <sub>3</sub> O <sub>6</sub> ) $\cdot e$ |
|------|---------------------------------------------------------------|---------------------------------------------------------------------|
| O1   | -1.6761                                                       | -1.5665                                                             |
| O2   | -1.676                                                        | -1.4373                                                             |
| O3   | -1.6925                                                       | -1.4264                                                             |
| O4   | -1.6923                                                       | -1.6156                                                             |

|         |         |         |
|---------|---------|---------|
| O5      | -1.7137 | -1.502  |
| O6      | -1.7139 | -1.5014 |
| Cr1     | +2.5409 | +2.5191 |
| Cr2     | +2.5409 | +2.4707 |
| Cr3/Ni3 | +2.5412 | +0.5468 |
| Cr4     | +2.5412 | +2.5121 |

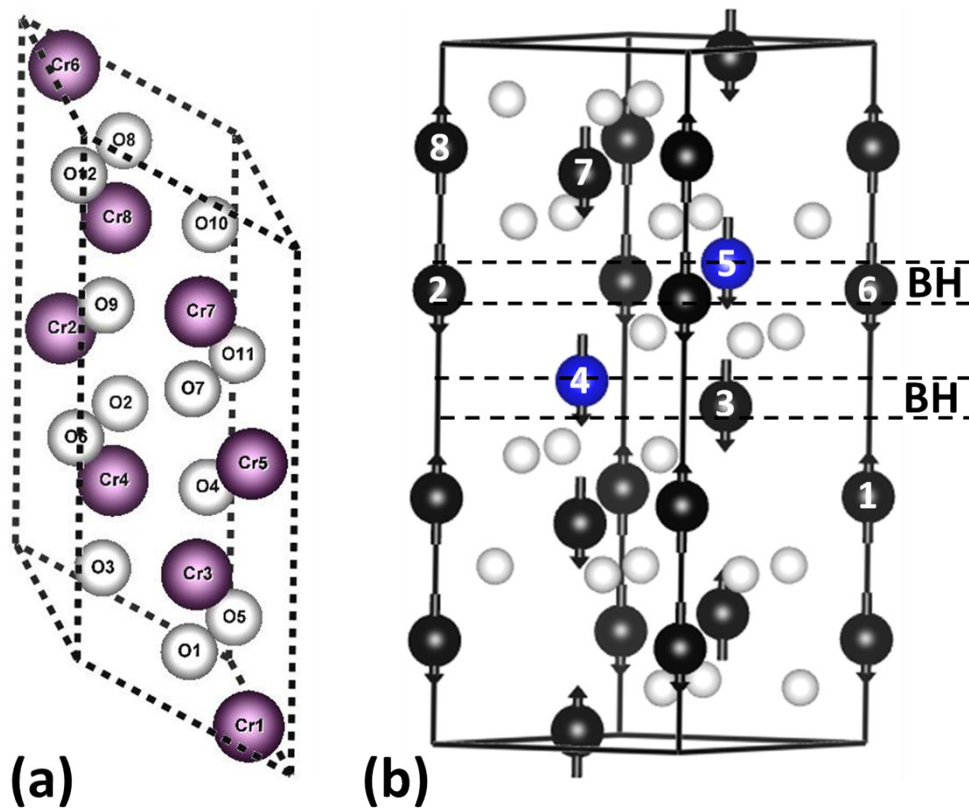

**Figure S11:** a) A diagram of the 20 atom  $1 \times 1 \times 2$  supercell showing the Cr and O atomic positions; in the first principles calculations, two Ni atoms are substituted. b) A 30 atom unit cell with the 8 cation positions marked in accordance to the  $1 \times 1 \times 2$  supercell. The final spin configurations are shown in the buckled honeycomb (BH) plane for Ni4-Ni5 (Case-5) substitution. The substitutational Ni spins are aligned with the surrounding tri-cluster Cr spins in the BH planes whereas the remainder of the structure maintains the original AFM configuration. The arrows representing the magnetic moments on the cations are not drawn to scale.

Table S6 shows the results from our DFT-based calculations for the energy values relative to the two nearest substituted Ni's in the supercell and the overall magnetic moment of the  $\alpha$ -Ni<sub>2</sub>(II)Cr<sub>6</sub>O<sub>12</sub> structure, for the cases of substitutional positions described below. Cases 1 correspond to having two nearby ++ Ni's (Fig. S9 a) and b)) substituted in the BH plane of the corundum structure; cases 2 represents substitution in the same BH plane; cases 3 and 4 correspond to substitution in alternate BH planes. Case 5 is substitution in adjoining BH planes. Cases 6 is the substitution in the alternate BH planes and farthest apart from each having opposite spin configuration. The relative energy values are calculated with respect to the Case-3.

**Table S6:** Calculation results for substitution of two Ni atoms for Cr atoms in various sites in a 20 atom 1x1x2 supercell.

|        | Substitution Sites | Initial Spin Configuration | Final Spin Configuration | Energy difference (eV) | Overall Magnetic Moment ( $\mu_B$ ) |
|--------|--------------------|----------------------------|--------------------------|------------------------|-------------------------------------|
| Case-1 | 3-5                | -+                         | -+                       | 0                      | 0                                   |
| Case-2 | 3-4                | -+                         | -+                       | -0.01                  | 0                                   |
| Case-3 | 4-7                | +-                         | +-                       | +0.17                  | 0                                   |
| Case-4 | 3-8                | -+                         | -+                       | +0.17                  | 0                                   |
| Case-5 | 4-5                | ++                         | --                       | +0.10                  | -5.92                               |
| Case-6 | 4-1                | ++                         | --                       | +0.16                  | -4.03                               |

## References

- (1) Schneider, C. A.; Rasband, W. S.; Eliceiri, K. W. *Nat. Methods* **2012**, *9* (7), 671–675.
- (2) Cheary, R. W.; Coelho, A. *J. Appl. Crystallogr.* **1992**, *25* (2), 109–121.
- (3) Coelho, A. A. *J. Appl. Crystallogr.* **2003**, *36* (1), 86–95.
- (4) Balzar, D.; Audebrand, N.; Daymond, M. R.; Fitch, A.; Hewat, A.; Langford, J. I.; Le Bail, A.; Louër, D.; Masson, O.; McCowan, C. N.; Popa, N. C.; Stephens, P. W.; Toby, B. H. *J. Appl. Crystallogr.* **2004**, *37* (6), 911–924.
- (5) Thompson, P.; Cox, D. E.; Hastings, J. B. *J. Appl. Crystallogr.* **1987**, *20* (2), 79–83.
- (6) Finger, L. W.; Cox, D. E.; Jephcoat, A. P. *J. Appl. Crystallogr.* **1994**, *27* (6), 892–900.
- (7) Henkelman, G.; Arnaldsson, A.; Jónsson, H. *Comput. Mater. Sci.* **2006**, *36* (3), 354–360.
- (8) Silvi, B.; Savin, A. *Nature* **1994**, *371* (6499), 683–686.
- (9) A. D. Becke, K. E. J. E. *J. Chem. Phys.* **1990**, *92* (9), 5397–5403.
- (10) Momma, K.; Izumi, F. *J. Appl. Crystallogr.* **2011**, *44* (6), 1272–1276.
